# Supplementary material
Source: publisher figshare collection journal article supplement (https://acs.figshare.com/ndownloader/files/5749953)
Supplement: Supplementary file 1 [file 5749953]

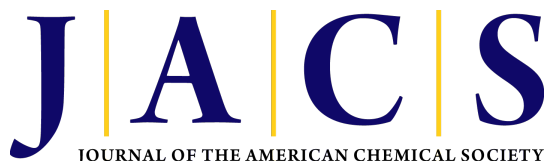

JOURNAL OF THE AMERICAN CHEMICAL SOCIETY

J. Am. Chem. Soc., 1996, 118(40), 9794-9795, DOI: [10.1021/ja960515j](https://doi.org/10.1021/ja960515j)

#### Terms & Conditions

Electronic Supporting Information files are available without a subscription to ACS Web Editions. The American Chemical Society holds a copyright ownership interest in any copyrightable Supporting Information. Files available from the ACS website may be downloaded for personal use only. Users are not otherwise permitted to reproduce, republish, redistribute, or sell any Supporting Information from the ACS website, either in whole or in part, in either machine-readable form or any other form without permission from the American Chemical Society. For permission to reproduce, republish and redistribute this material, requesters must process their own requests via the RightsLink permission system. Information about how to use the RightsLink permission system can be found at <http://pubs.acs.org/page/copyright/permissions.html>

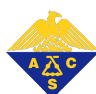

ACS Publications

MOST TRUSTED. MOST CITED. MOST READ.

Copyright © 1996 American Chemical Society

# An Unusual Turn Structure in Peptides Containing $\alpha$ -Aminoxyacids

## SUPPORTING INFORMATION

Dan Yang,\* Fei-Fu Ng, and Zhan-Ji Li

*Department of Chemistry, The University of Hong Kong, Pokfulam Road, Hong Kong*

Yun-Dong Wu,\* Kyle W. K. Chan, and De-Ping Wang

*Department of Chemistry, Hong Kong University of Science and Technology,*

*Clear Water Bay, Kowloon, Hong Kong*

### Synthesis and Characterization of Compounds 10–13

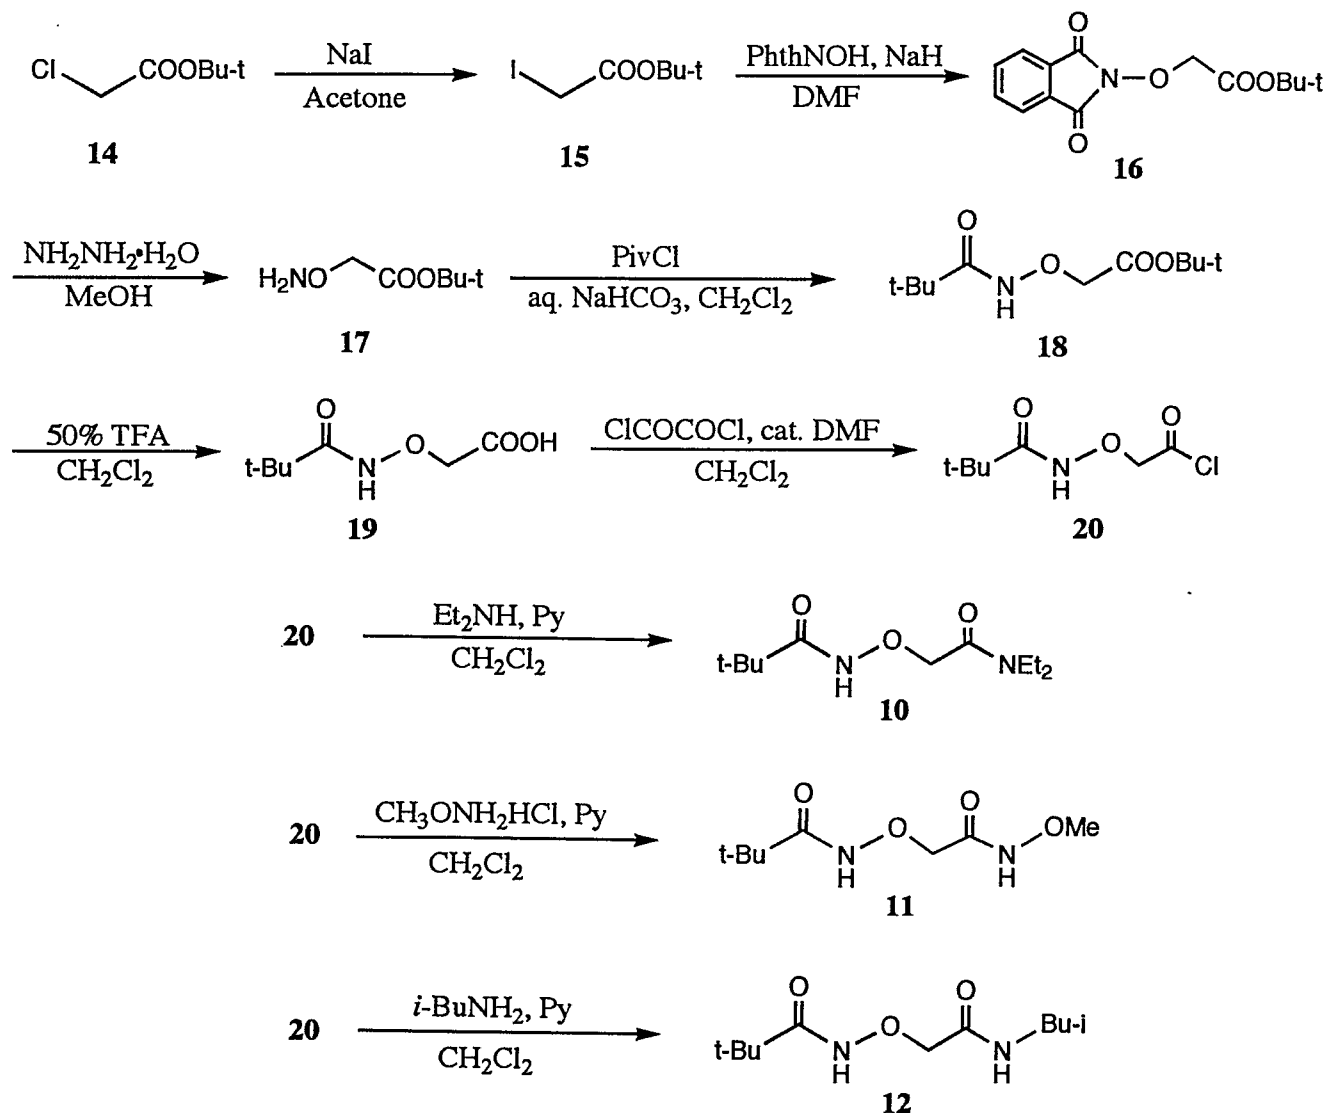

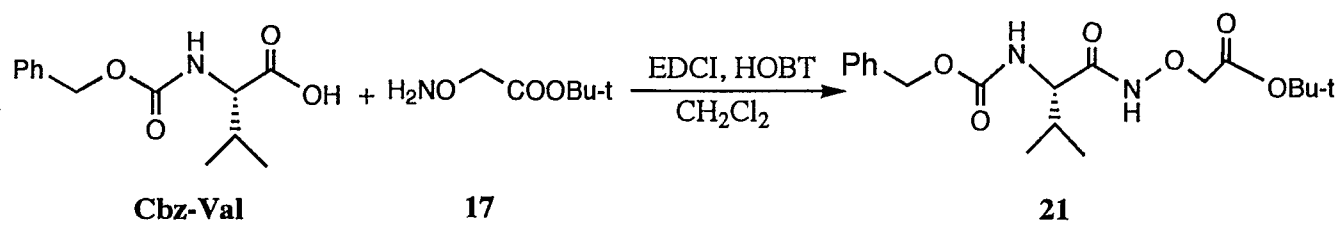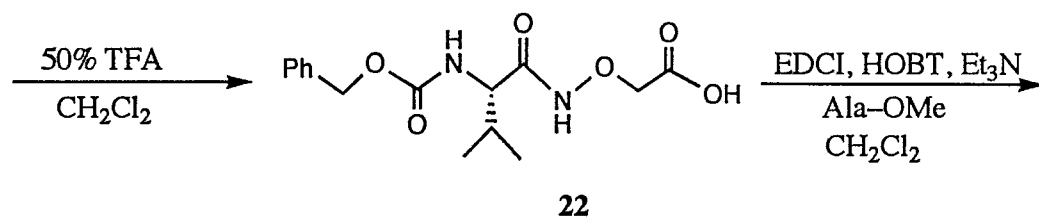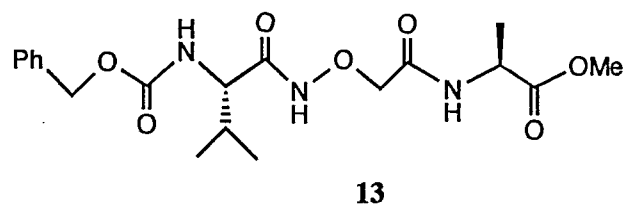

### Preparation of Compounds 15 and 16

To a solution of sodium iodide (5.51 g, 36 mmol) in dry acetone (30 mL), compound **14** (4.61 g, 31 mmol) in acetone (10 mL) was added. A precipitate of sodium chloride soon began to form. The mixture was stirred at room temperature for 30 min and then refluxed for 1 h. After removal of solvent under reduced pressure, the residue was dissolved in dichloromethane and washed with sodium thiosulphate solution (2 x 20 mL) and water (10 mL). The organic layer was dried and concentrated under vacuum to give 3.35 g of brown oil. This crude product **15** was used in the next step without further purification.

To a suspension of sodium hydride (60% dispersion in mineral oil, 1.23 g, 31 mmol) in DMF (5 mL) in an ice bath, N-hydroxyphthalimide (4.9 g, 31 mmol) in DMF (5 mL) was added over a period of 10 min. The mixture was stirred for further 30 min at room temperature. Then a solution of crude product **15** in DMF was added to the mixture. The reaction was stirred overnight. DMF was evaporated under reduced pressure. To the residue was added saturated ammonium chloride solution (50 mL) and extracted with ether (3 x 30 mL). The organic layer was separated and further washed with water (20 mL), brine (2 x 20 mL) and dried over anhydrous sodium sulphate. Solvent was removed under reduced pressure. Purification by flash column chromatography provided 5.23 g of compound **16** (18 mmol, yield 61%) as a white solid:  $^1\text{H}$  NMR (300 MHz,  $\text{CDCl}_3$ )  $\delta$  1.49 (s, 9H), 4.72 (s, 2H), 7.85 (m, 4H);  $^{13}\text{C}$  NMR (75.47 MHz,  $\text{CDCl}_3$ )  $\delta$  166.0, 163.1, 134.6, 128.9, 123.6, 83.0, 73.4, 28.0; HRMS for  $\text{C}_{14}\text{H}_{15}\text{O}_5\text{N}$  ( $\text{M}^+$ ), calcd 277.0950, found 277.0951.

### Preparation of Compounds 17 and 18

To compound **16** (1.77 g, 6.38 mmol) in 15 mL of methanol was added, hydrazine hydrate (1.28 mL, 25.6 mmol) was added. The mixture was stirred at room temperature for 15 min and concentrated under vacuum. The residue was dissolved in 3% sodium carbonate solution (10 mL) and extracted with diethyl ether (2 x 20 mL). The organic layer was dried over anhydrous sodium sulphate and concentrated under reduced pressure to give the crude product **17** which was used in the next step without further purification.

To a vigorously stirred solution of compound **17** in 5 mL of 6% sodium bicarbonate solution and 5 mL of dichloromethane, 0.54 mL of pivaloyl chloride (6.39 mmol) was added dropwise in an ice bath. The reaction mixture was stirred overnight. The organic layer was separated out and washed with water (10 mL). After removal of solvent, 0.93 g of compound **18** (4.34 mmol, yield 68%) was obtained as a white solid:  $^1\text{H}$  NMR (300 MHz,  $\text{CDCl}_3$ )  $\delta$  1.19 (s, H), 1.50 (s, 9H), 4.36 (s, 2H), 9.13 (s, 1H);  $^{13}\text{C}$  NMR (75.47 MHz,  $\text{CDCl}_3$ )  $\delta$  175.6, 169.3, 82.8, 72.3, 38.0, 28.1, 27.1; CIMS  $m/z$  232 ( $\text{M}^++1$ ).

### Preparation of Acid 19

To compound **18** (0.89 g, 4.13 mmol) dissolved in 5 mL of dichloromethane in an ice

bath, 5 mL of trifluoroacetic acid was added. The reaction was then stirred at room temperature for 2 h and concentrated to dryness. Then 10 mL of 6% sodium bicarbonate solution was added to dissolve the residue, then washed with dichloromethane (2 x 5 mL). The aqueous layer was acidified with dilute hydrochloric acid and extracted with ethyl acetate (2 x 15 mL). The organic layer was concentrated under reduced pressure to provide 0.62 g of acid **18** (3.92 mmol, yield 95%):  $^1\text{H}$  NMR (300 MHz,  $\text{CD}_3\text{CN}$ )  $\delta$  1.17 (s, 9H), 4.47 (s, 2H), 10.12 (s, 1H);  $^{13}\text{C}$  NMR (75.47 MHz,  $\text{CDCl}_3$ )  $\delta$  180.3, 170.9, 76.2, 37.9, 26.6; CIMS  $m/z$  176 ( $\text{M}^++1$ ).

### Preparation of Acid Chloride **20**

To a solution of acid **19** (0.62 g, 3.92 mmol) in 10 mL of dichloromethane was added 0.68 mL of oxalyl chloride (7.8 mmol), followed by 2 drops of DMF. The reaction was stirred until no further gas evolution was noticed. The solution was concentrated under reduced pressure and azeotroped with toluene to provide acid chloride **20** which was used in the preparation of diamide **10**, **11**, **12** without further purification.

### Preparation and Characterization of Diamide **10**

The acid chloride **20** was stirred with pyridine (0.37 mL, 4.28 mmol) in dichloromethane in an ice bath and diethylamine (0.89 mL, 8.53 mmol) was added in dropwise. The reaction was stirred for 4 h. After removal of solvent, purification by flash column chromatography provided 0.56 g of compound **10** (2.42 mmol, yield 62%) as a brown oil:  $^1\text{H}$  NMR (300 MHz,  $\text{CDCl}_3$ )  $\delta$  1.19 (m, 15 H), 3.19 (q,  $J = 7.2$  Hz, 2H), 3.4 (q,  $J = 7.1$  Hz, 2H), 4.58 (s, 2H), 9.82 (s, 1H);  $^{13}\text{C}$  NMR (75.47 MHz,  $\text{CDCl}_3$ )  $\delta$  175.6, 168.0, 72.0, 41.1, 40.3, 37.9, 27.1, 14.1, 12.9; IR ( $\text{CH}_2\text{Cl}_2$ )  $3400\text{ cm}^{-1}$ ; CIMS  $m/z$  231 ( $\text{M}^++1$ ), HRMS for  $\text{C}_{11}\text{H}_{22}\text{N}_2\text{O}_3$  ( $\text{M}^+$ ), calcd 230.1630, found 230.1628.

### Preparation and Characterization of Diamide **11**

The acid chloride **20** was stirred with pyridine (0.74 mL, 8.58 mmol) in dichloromethane in an ice bath and of O-methyl hydroxylamine hydrochloride (0.71 g, 8.58 mmol) was added in. The reaction mixture was stirred under nitrogen for 4 h. After removal of solvent under vacuum, purification by flash column chromatography provided 0.46 g of compound **11** (2.26 mmol, yield 58%):  $^1\text{H}$  NMR (300 MHz,  $\text{CDCl}_3$ )  $\delta$  1.23 (s, 9H), 3.80 (s, 3H), 4.43 (s, 2H), 8.83 (s, 1H), 11.5 (s, 1H);  $^{13}\text{C}$  NMR (75.47 MHz,  $\text{CDCl}_3$ )  $\delta$  178.0, 165.9, 75.7, 64.2, 38.1, 27.0; IR ( $\text{CH}_2\text{Cl}_2$ )  $3386, 3200\text{ cm}^{-1}$ ; CIMS  $m/z$  205 ( $\text{M}^++1$ ), HRMS for  $\text{C}_8\text{H}_{16}\text{N}_2\text{O}_4$  ( $\text{M}^+$ ), calcd 204.1110, found 204.1103.

### Preparation and Characterization of Diamide **12**

The acid chloride **20** was stirred with pyridine (0.74 mL, 8.58 mmol) in dichloromethane (5 mL) in an ice bath and isobutylamine (0.78 mL, 7.8 mmol) was added in

dropwise. The reaction mixture was stirred under nitrogen for 4 h. After removal of solvent under vacuum, purification by flash column chromatography provided 0.538 g of pure compound **12** as a white solid (2.34 mmol, 60% yield):  $^1\text{H}$  NMR (300 MHz,  $\text{CDCl}_3$ )  $\delta$  0.93 (d,  $J = 6.7$  Hz, 6H), 1.21 (s, 9H), 1.83 (m, 1H), 3.12 (t,  $J = 6.3$  Hz, 2H), 4.35 (s, 2H), 8.53 (br, 1H), 9.50 (br, 1H);  $^{13}\text{C}$  NMR (75.47 MHz,  $\text{CDCl}_3$ )  $\delta$  178.6, 168.7, 76.0, 46.6, 38.0, 28.4, 27.1, 20.2; IR ( $\text{CH}_2\text{Cl}_2$ ) 3428, 3385, 3300  $\text{cm}^{-1}$ ; CIMS  $m/z$  231 ( $\text{M}^+ + 1$ ), HRMS for  $\text{C}_{11}\text{H}_{22}\text{N}_2\text{O}_3$  ( $\text{M}^+$ ), calcd 230.1630, found 230.1630.

### Preparation and Characterization of Tripeptide **13**

To a suspension of *N*-Cbz-*L*-Valine (1.63 g, 6.5 mmol) and compound **17** (0.6 g, 5.42 mmol) in dichloromethane (10 mL), 1.32 g of 1-hydroxy-benzotriazole (9.75 mmol) was added, followed by 2.90 g of 1-(3-dimethylaminopropyl)-3-ethylcarbodiimide methiodide (9.75 mmol). The reaction mixture was stirred under nitrogen overnight. The organic layer was separated out and washed with 6% sodium bicarbonate solution and brine. After removal of solvent under vacuum, purification by flash column chromatography provided 1.54 g of compound **21** (4.65 mmol, yield 75%):  $^1\text{H}$  NMR (300 MHz,  $\text{CDCl}_3$ )  $\delta$  9.56 (s, 1H), 7.34 (m, 5H), 5.43 (s, 1H), 5.11 (s, 2H), 4.37 (s, 2H), 3.87 (m, 1H), 2.06 (m, 1H), 1.48 (s, 9H), 0.94 (d,  $J = 6.6$  Hz, 6H).

To compound **21** (1.54 g, 4.065 mmol) dissolved in 10 mL of dichloromethane in an ice bath, was added 10 mL of trifluoroacetic acid. The reaction was then stirred at room temperature for 2 h and concentrated to dryness. The residue was dissolved in 15 mL of 6% sodium bicarbonate solution, then washed with dichloromethane (2 x 5 mL). The aqueous layer was acidified with dilute hydrochloric acid and extracted with ethyl acetate (3 x 25 mL). The organic layer was dried and concentrated under reduced pressure to provide 1.26 g of acid **22** (3.90 mmol, yield 96%).

The acid **22** was dissolved in 10 mL of  $\text{CH}_2\text{Cl}_2$ , then 0.65 g of *L*-Alanine methyl ester hydrochloride (4.68 mmol) and 1.30 mL of triethylamine (9.36 mmol) were added. The salt was dissolved and 1.05 g of 1-hydroxy-benzotriazole (7.8 mmol) was added, followed by 1.53 g of 1-(3-dimethylaminopropyl)-3-ethylcarbodiimide methiodide (5.15 mmol). The reaction mixture was stirred under nitrogen overnight. The organic layer was separated out and washed with 6% sodium bicarbonate solution and brine. After removal of solvent under vacuum, purification by flash column chromatography provided 1.31 g of tripeptide **13** as white solid (3.20 mmol, yield 82%):  $^1\text{H}$  NMR (300 MHz,  $\text{CDCl}_3$ )  $\delta$  10.11 (s, 1H), 8.42 (d,  $J = 7.41$  Hz, 1H), 7.35 (m, 5H), 5.56 (d,  $J = 9$  Hz, 1H), 5.12 (d,  $J = 12.1$  Hz, 1H), 5.03 (d,  $J = 12.2$  Hz, 1H), 4.60 (m, 1H), 4.37 (d,  $J = 3.32$  Hz, 2H), 3.85 (m, 1H), 3.71 (s, 3H), 2.11 (m, 1H), 1.44 (d,  $J = 7.3$  Hz, 3H), 0.96 (d,  $J = 4.13$  Hz, 3H), 0.94 (d,  $J = 4.1$  Hz, 3H);  $^{13}\text{C}$  NMR (75.47 MHz,  $\text{CDCl}_3$ )  $\delta$  173.1, 170.8, 168.1, 156.7, 135.8, 128.6, 128.4, 128.0, 75.8, 67.4, 58.2, 52.5, 47.8, 30.4, 19.1, 18.2, 17.6; FABMS(+ve) 410 ( $\text{M}^+ + 1$ ).

$^1\text{H}$  NMR dilution experiments were carried out on a Bruker-300 DPX multinuclear FT-NMR spectrometer. IR experiments were carried out on a Perkin Elmer 1600 FT-IR spectrometer or a Bio-Rad FT-155 spectrometer.

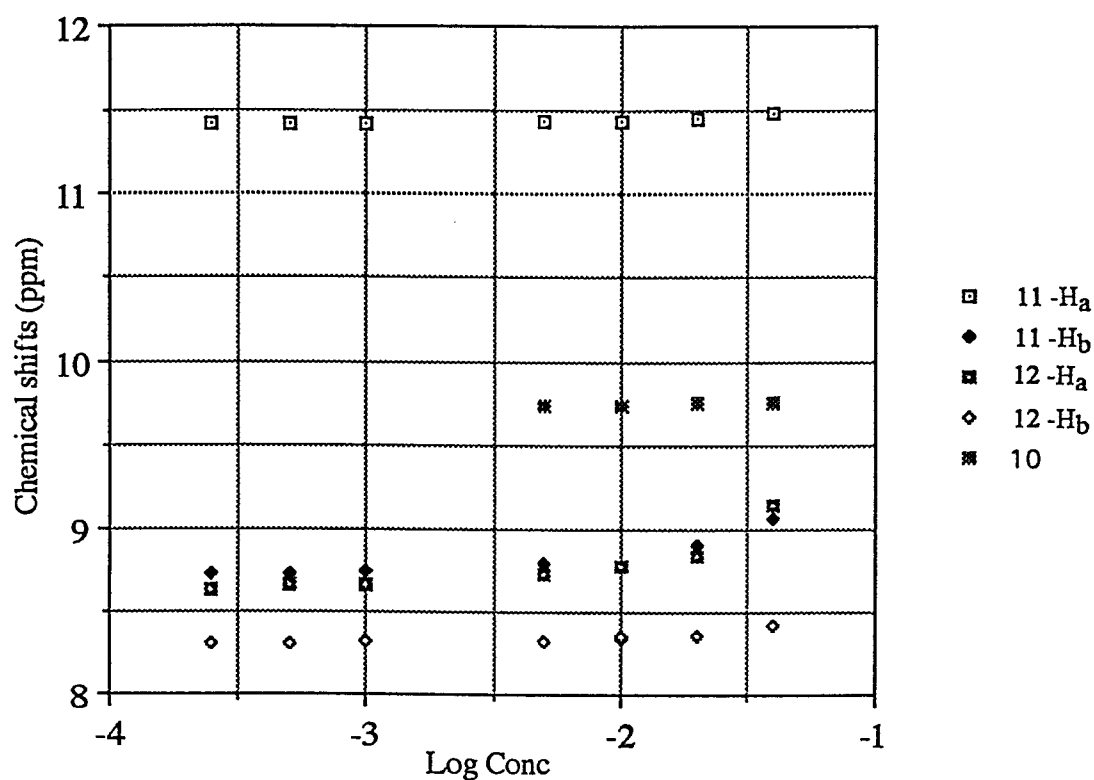

**Figure 1.**  $^1\text{H}$  NMR chemical shifts of amide protons of compounds **10–12** in  $\text{CD}_2\text{Cl}_2$  at 25 °C as a function of the logarithm of concentration

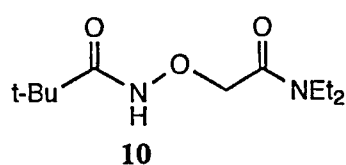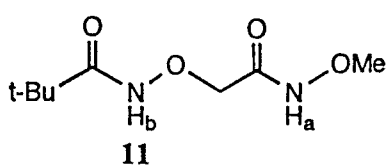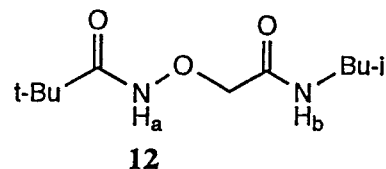

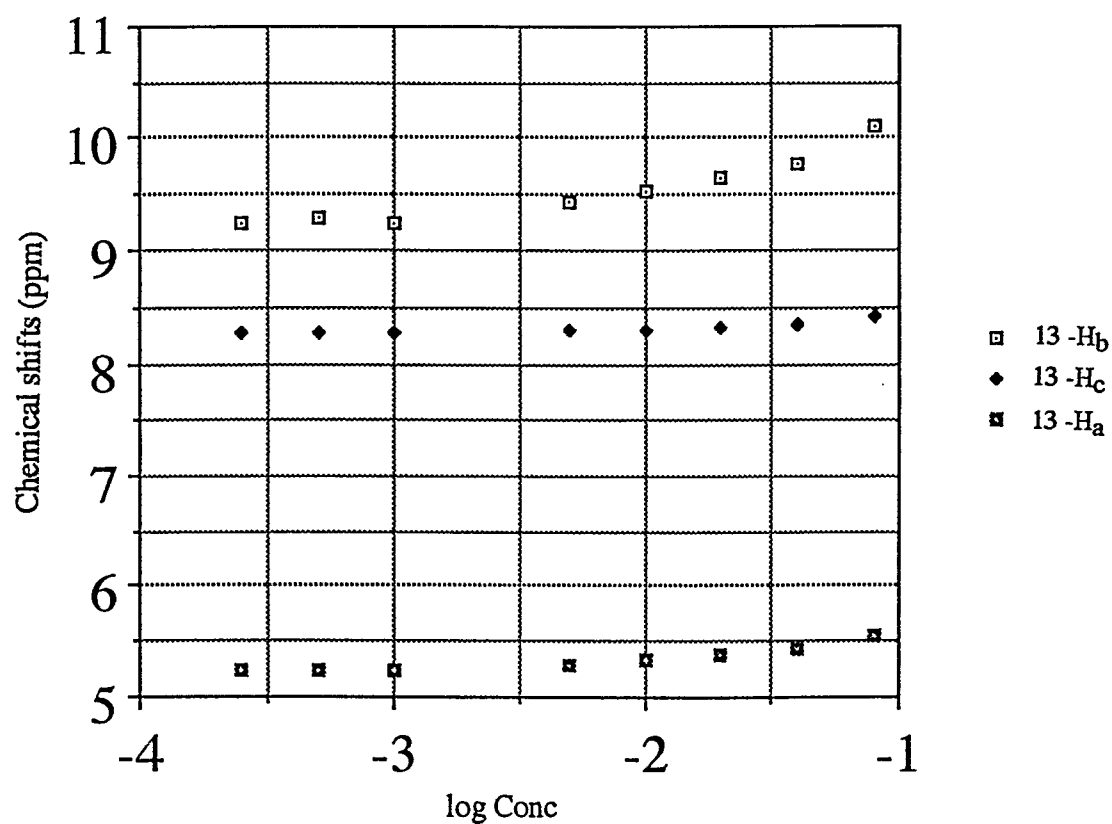

**Figure 2.**  $^1\text{H}$  NMR chemical shifts of amide protons of compound **13** in  $\text{CD}_2\text{Cl}_2$  at  $25^\circ\text{C}$  as a function of the logarithm of concentration

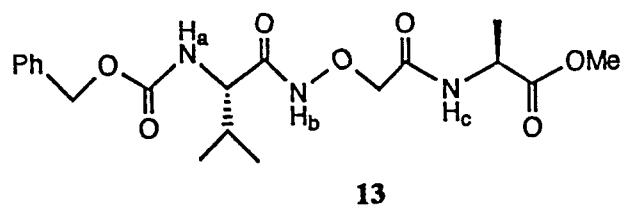



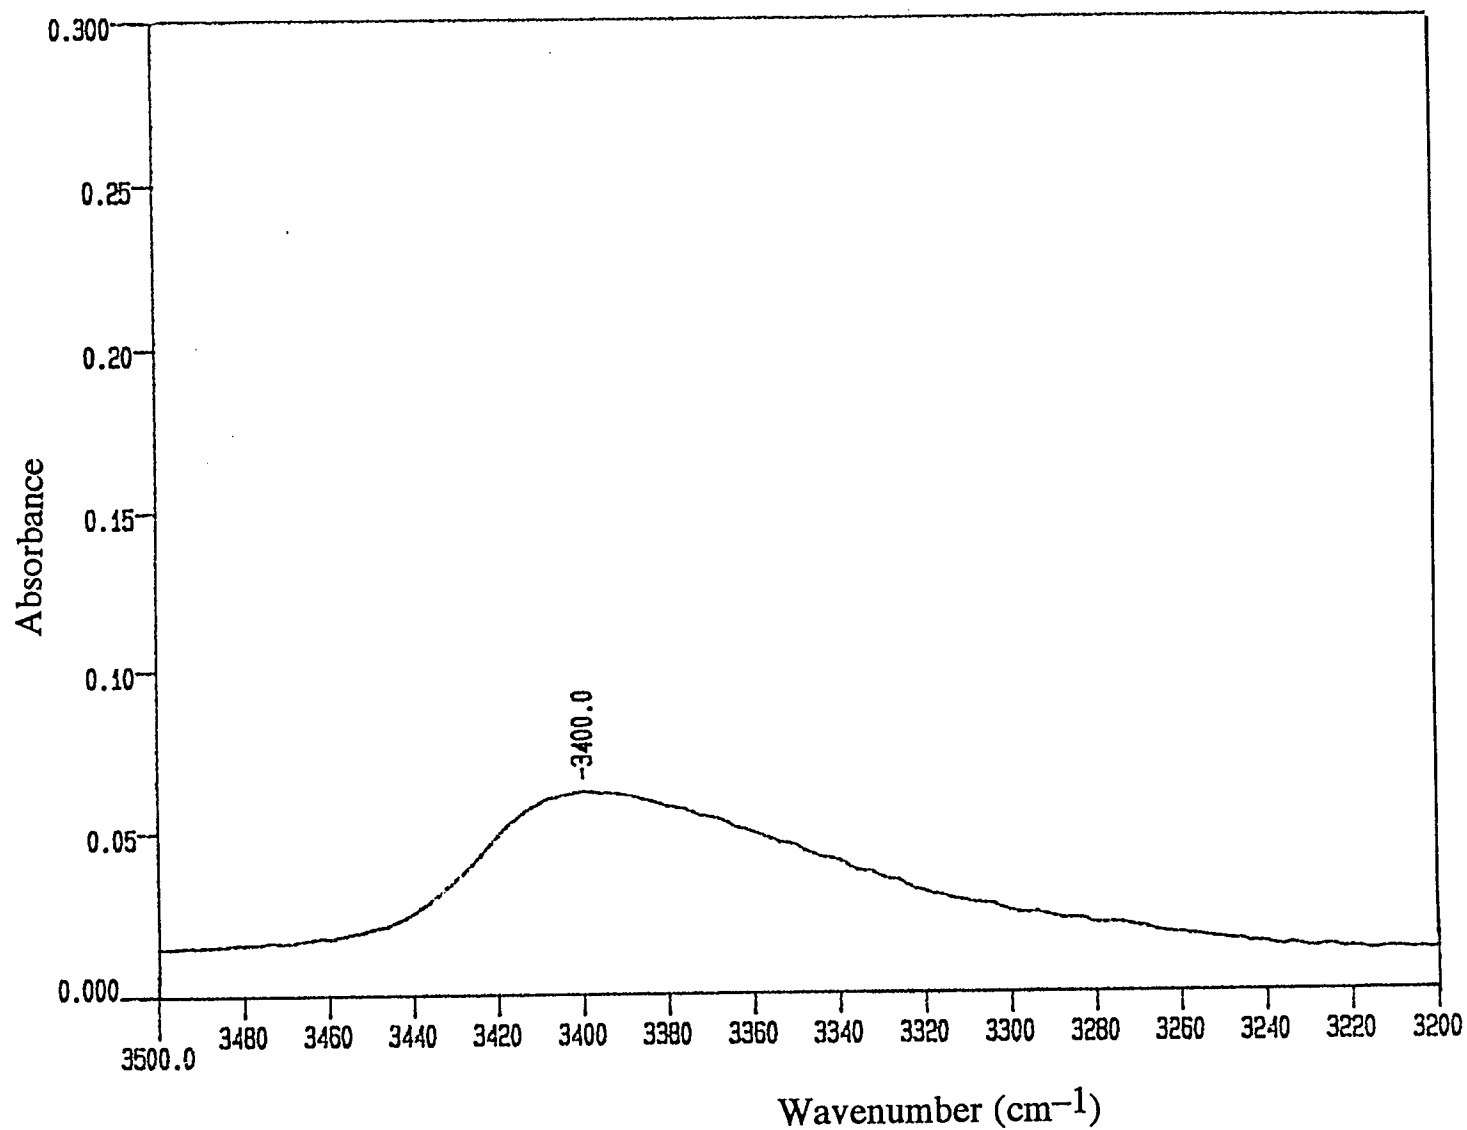

**Figure 3.** FTIR spectra for the N-H stretch region of **10** in CH<sub>2</sub>Cl<sub>2</sub> solution at room temperature after subtraction of the spectrum of pure CH<sub>2</sub>Cl<sub>2</sub> (5 mM)

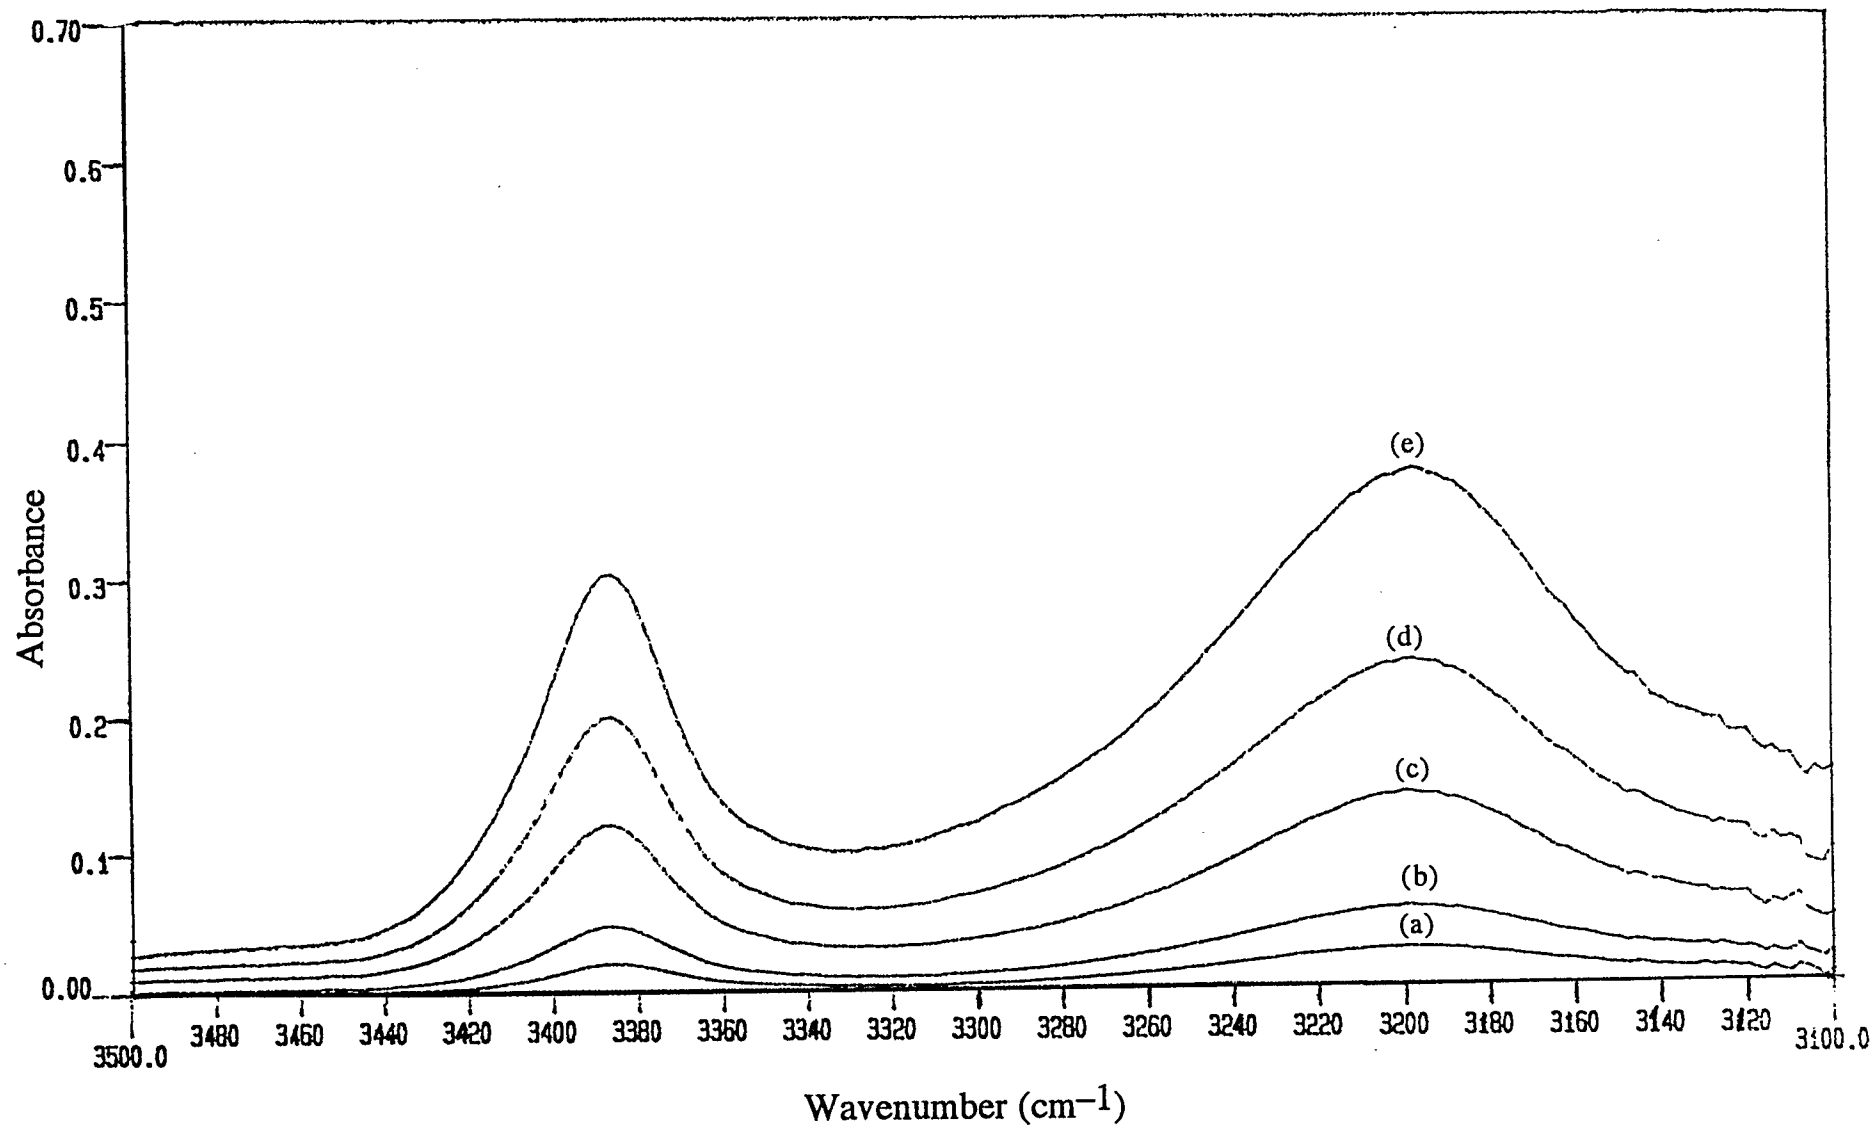

**Figure 4.** FTIR spectra for the N-H stretch region of **11** in  $\text{CH}_2\text{Cl}_2$  solution at room temperature after subtraction of the spectrum of pure  $\text{CH}_2\text{Cl}_2$ : (a) 0.5, (b) 1, (c) 5, (d) 10, (e) 20 mM

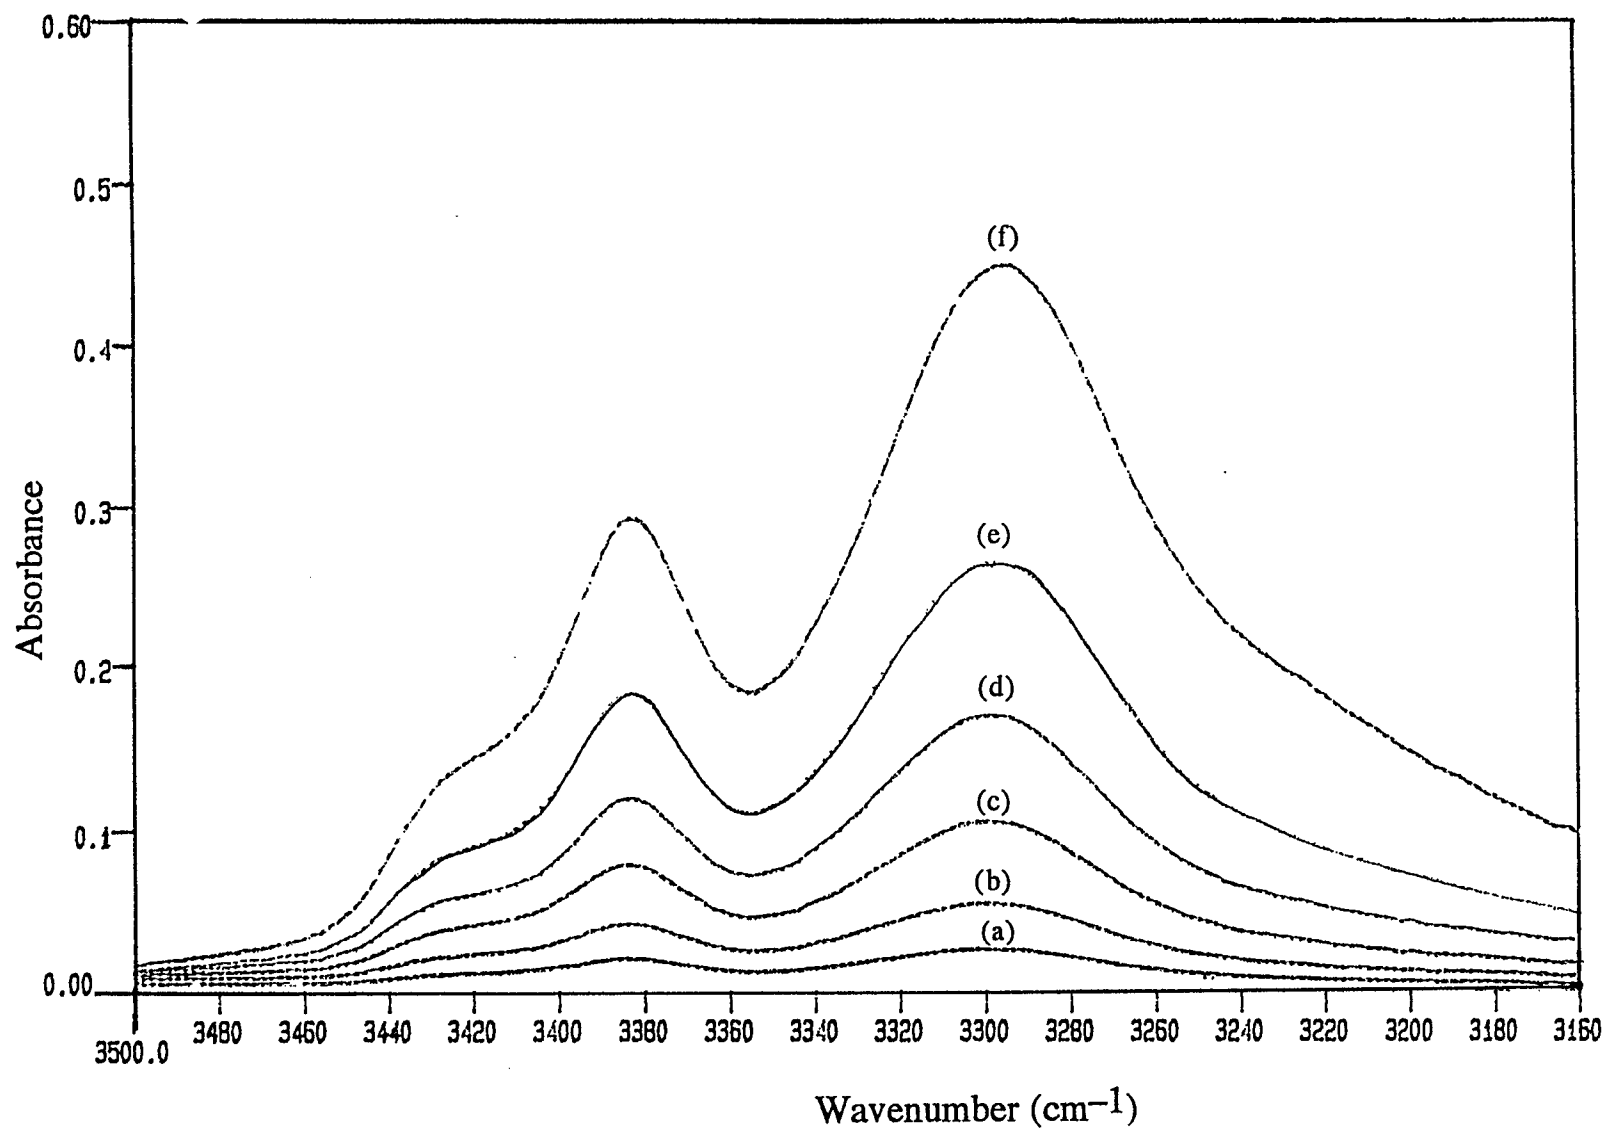

**Figure 5.** FTIR spectra for the N-H stretch region of **12** in  $\text{CH}_2\text{Cl}_2$  solution at room temperature after subtraction of the spectrum of pure  $\text{CH}_2\text{Cl}_2$ : (a) 0.5, (b) 1, (c) 5, (d) 10, (e) 20, (f) 40 mM, after subtraction of the spectrum of pure  $\text{CH}_2\text{Cl}_2$

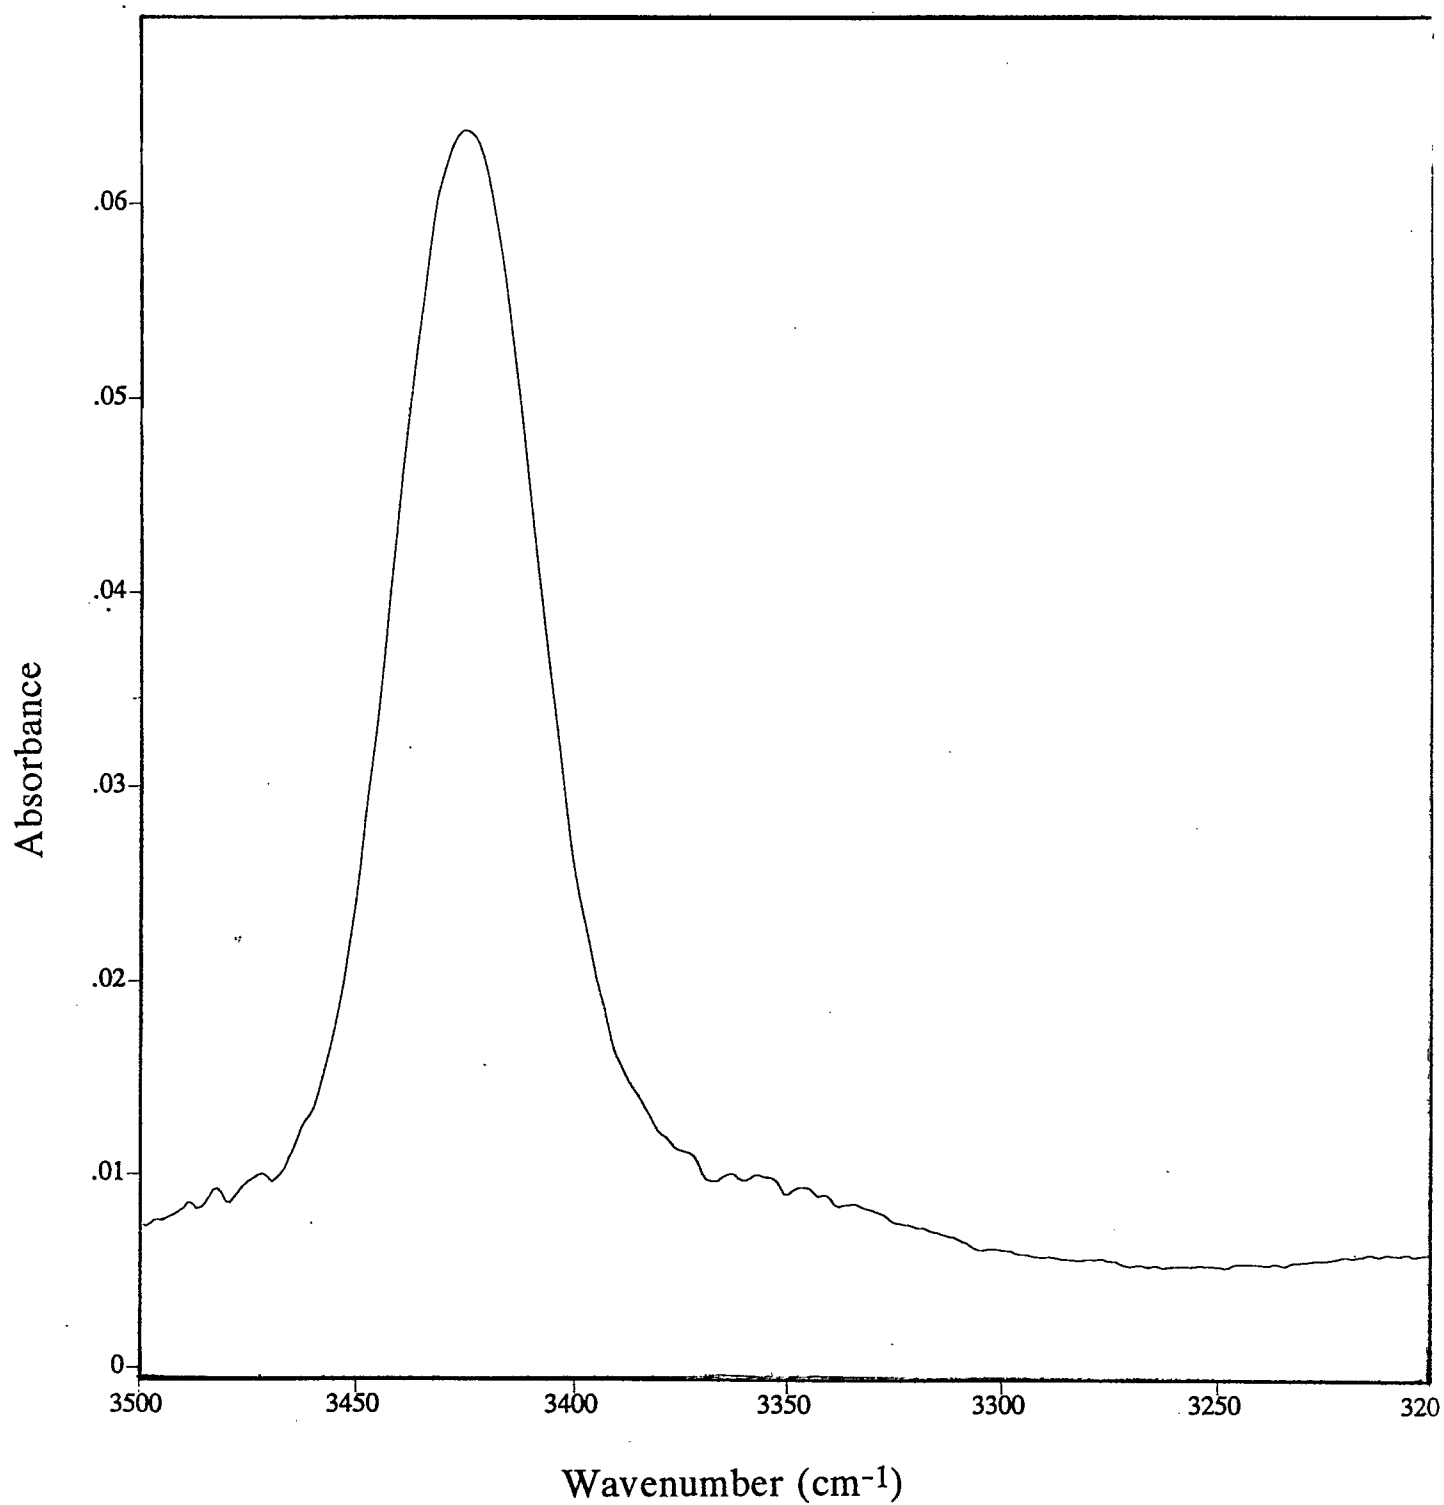

**Figure 6:** FTIR spectra for N-H stretch region of *N*-Cbz-Val-Ala-OMe (5mM) in CH<sub>2</sub>Cl<sub>2</sub> at room temperature after subtraction of the spectrum of pure CH<sub>2</sub>Cl<sub>2</sub>

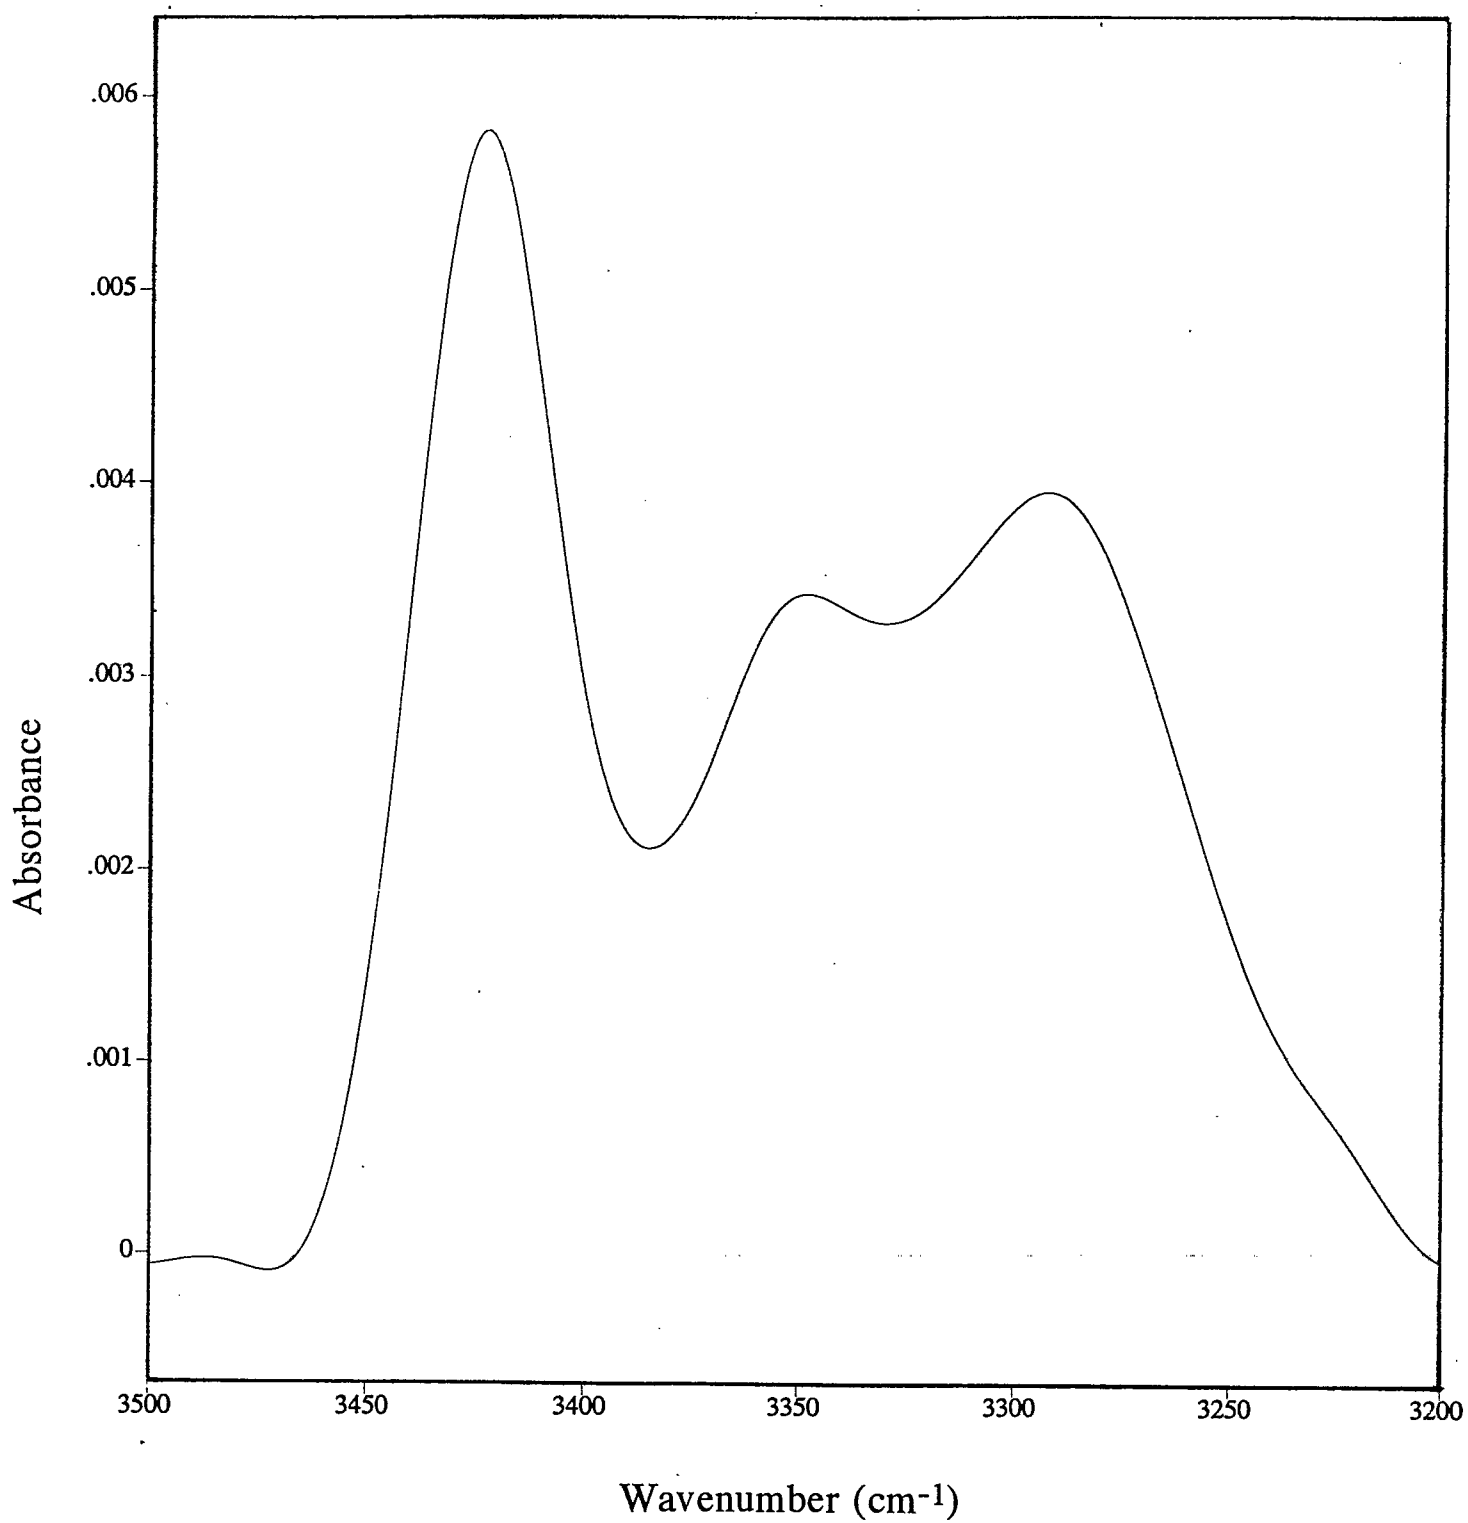

**Figure 7:** FTIR spectra for N–H stretch region of compound **13** (0.5 mM) in CH<sub>2</sub>Cl<sub>2</sub> at room temperature after subtraction of the spectrum of pure CH<sub>2</sub>Cl<sub>2</sub>

### The cartesian coordinates of structure 5 (HF/6-31G\*)

| Center<br>Number | Atomic<br>Number | Coordinates (Angstroms) |           |           |
|------------------|------------------|-------------------------|-----------|-----------|
|                  |                  | X                       | Y         | Z         |
| 1                | 6                | 1.187624                | 0.375101  | 0.286039  |
| 2                | 6                | -0.318124               | 0.571072  | 0.113107  |
| 3                | 7                | -1.010718               | -0.565004 | -0.182752 |
| 4                | 8                | -2.278448               | -0.397414 | -0.666146 |
| 5                | 8                | -0.830716               | 1.629403  | 0.321769  |
| 6                | 1                | -0.526345               | -1.283093 | 0.672966  |
| 7                | 6                | -3.236190               | -0.531511 | 0.355007  |
| 8                | 1                | -4.196291               | -0.410360 | -0.126613 |
| 9                | 1                | -3.105031               | 0.235512  | 1.105889  |
| 10               | 1                | -3.175294               | -1.512937 | 0.812193  |
| 11               | 6                | 1.949204                | 1.538464  | -0.338458 |
| 12               | 1                | 3.012001                | 1.447132  | -0.145455 |
| 13               | 1                | 1.601259                | 2.475242  | 0.073647  |
| 14               | 1                | 1.795624                | 1.550713  | -1.411648 |
| 15               | 8                | 1.554898                | -0.859080 | -0.270313 |
| 16               | 6                | 2.704851                | -1.454310 | 0.256944  |
| 17               | 1                | 2.821887                | -2.410424 | -0.233018 |
| 18               | 1                | 2.606248                | -1.614499 | 1.327533  |
| 19               | 1                | 3.590647                | -0.856106 | 0.070725  |
| 20               | 1                | 1.360269                | 0.357689  | 1.360654  |

### The cartesian coordinates of structure 6 (HF/6-31G\*)

| Center<br>Number | Atomic<br>Number | Coordinates (Angstroms) |           |           |
|------------------|------------------|-------------------------|-----------|-----------|
|                  |                  | X                       | Y         | Z         |
| 1                | 6                | -1.258355               | 0.360352  | -0.219861 |
| 2                | 6                | 0.208655                | 0.792091  | -0.267907 |
| 3                | 7                | 1.082894                | -0.247541 | -0.332378 |
| 4                | 8                | 2.410737                | 0.084723  | -0.174916 |
| 5                | 8                | 0.512882                | 1.943298  | -0.338439 |
| 6                | 1                | 0.804286                | -1.097576 | 0.106334  |
| 7                | 6                | 3.119922                | -0.942111 | 0.449952  |
| 8                | 1                | 4.142253                | -0.601217 | 0.513929  |
| 9                | 1                | 3.083555                | -1.858948 | -0.132396 |
| 10               | 1                | 2.740721                | -1.132470 | 1.451077  |
| 11               | 6                | -2.059929               | 1.288888  | 0.683052  |
| 12               | 1                | -3.112957               | 1.032331  | 0.656052  |
| 13               | 1                | -1.943655               | 2.313909  | 0.360530  |
| 14               | 1                | -1.712891               | 1.204852  | 1.706754  |
| 15               | 8                | -1.328132               | -0.977042 | 0.204835  |
| 16               | 6                | -2.436137               | -1.705065 | -0.240071 |
| 17               | 1                | -2.331427               | -2.710996 | 0.141204  |
| 18               | 1                | -2.470680               | -1.739144 | -1.325771 |
| 19               | 1                | -3.367017               | -1.287476 | 0.129038  |
| 20               | 1                | -1.621286               | 0.436757  | -1.242953 |

### The cartesian coordinates of structure 8 (HF/6-31G\*)

| Center<br>Number | Atomic<br>Number | Coordinates (Angstroms) |           |           |
|------------------|------------------|-------------------------|-----------|-----------|
|                  |                  | X                       | Y         | Z         |
| 1                | 6                | 3.105858                | 0.014852  | 0.733813  |
| 2                | 6                | 1.799651                | 0.198812  | -0.002229 |
| 3                | 7                | 0.947121                | -0.877171 | 0.109555  |
| 4                | 8                | -0.035856               | -0.956302 | -0.842546 |
| 5                | 8                | 1.520937                | 1.194937  | -0.596909 |
| 6                | 1                | 1.387332                | -1.767976 | 0.215788  |
| 7                | 6                | -1.316541               | -1.101737 | -0.275851 |
| 8                | 6                | -1.991309               | 0.181110  | 0.185444  |
| 9                | 1                | -1.930277               | -1.525067 | -1.059611 |
| 10               | 1                | -1.296170               | -1.789306 | 0.557719  |
| 11               | 1                | 3.016600                | -0.666420 | 1.571447  |
| 12               | 1                | 3.845712                | -0.377658 | 0.043081  |
| 13               | 1                | 3.444896                | 0.979227  | 1.083169  |
| 14               | 8                | -2.989386               | 0.093010  | 0.848648  |
| 15               | 7                | -1.459770               | 1.332398  | -0.244520 |
| 16               | 1                | -0.558492               | 1.372688  | -0.670888 |
| 17               | 1                | -1.872578               | 2.176539  | 0.083445  |

### The cartesian coordinates of structure 9 (HF/6-31G\*)

| Center<br>Number | Atomic<br>Number | Coordinates (Angstroms) |           |           |
|------------------|------------------|-------------------------|-----------|-----------|
|                  |                  | X                       | Y         | Z         |
| 1                | 6                | -3.021011               | 1.048712  | 0.412808  |
| 2                | 6                | -2.080794               | -0.096425 | 0.107533  |
| 3                | 7                | -0.806390               | 0.314816  | -0.195780 |
| 4                | 8                | -0.024030               | -0.595974 | -0.849310 |
| 5                | 8                | -2.403170               | -1.241828 | 0.163891  |
| 6                | 1                | -0.657701               | 1.227279  | -0.569153 |
| 7                | 6                | 1.083883                | -0.945497 | -0.088366 |
| 8                | 6                | 2.082920                | 0.200486  | 0.013336  |
| 9                | 1                | 0.787119                | -1.268329 | 0.903431  |
| 10               | 1                | 1.543587                | -1.781936 | -0.601210 |
| 11               | 1                | -2.502866               | 1.923206  | 0.788615  |
| 12               | 1                | -3.545819               | 1.323485  | -0.496960 |
| 13               | 1                | -3.749311               | 0.716397  | 1.138625  |
| 14               | 8                | 1.885184                | 1.274951  | -0.476701 |
| 15               | 7                | 3.200573                | -0.095587 | 0.714395  |
| 16               | 1                | 3.395259                | -1.008383 | 1.055148  |
| 17               | 1                | 3.916583                | 0.592840  | 0.776297  |
